# Supplementary material for: Detection and phylogenetic characterization of arbovirus dual-infections among persons during a chikungunya fever outbreak, Haiti 2014
Source: PubMed Central journal article supplement (PMC5997359; doi:10.1371/journal.pntd.0006505), 2018-05-31

# A CHIKV

- Haiti
- Dominican Republic
- Trinidad and Tobago
- El Salvador
- Puerto Rico
- French Guiana
- Brazil
- US Virgin Islands
- Honduras
- Jamaica
- British Virgin Islands
- Mexico
- Saint Lucia
- Guadeloupe
- Colombia
- Panama
- Martinique
- Guatemala
- Philippines
- Guyana
- French Polynesia
- Nicaragua

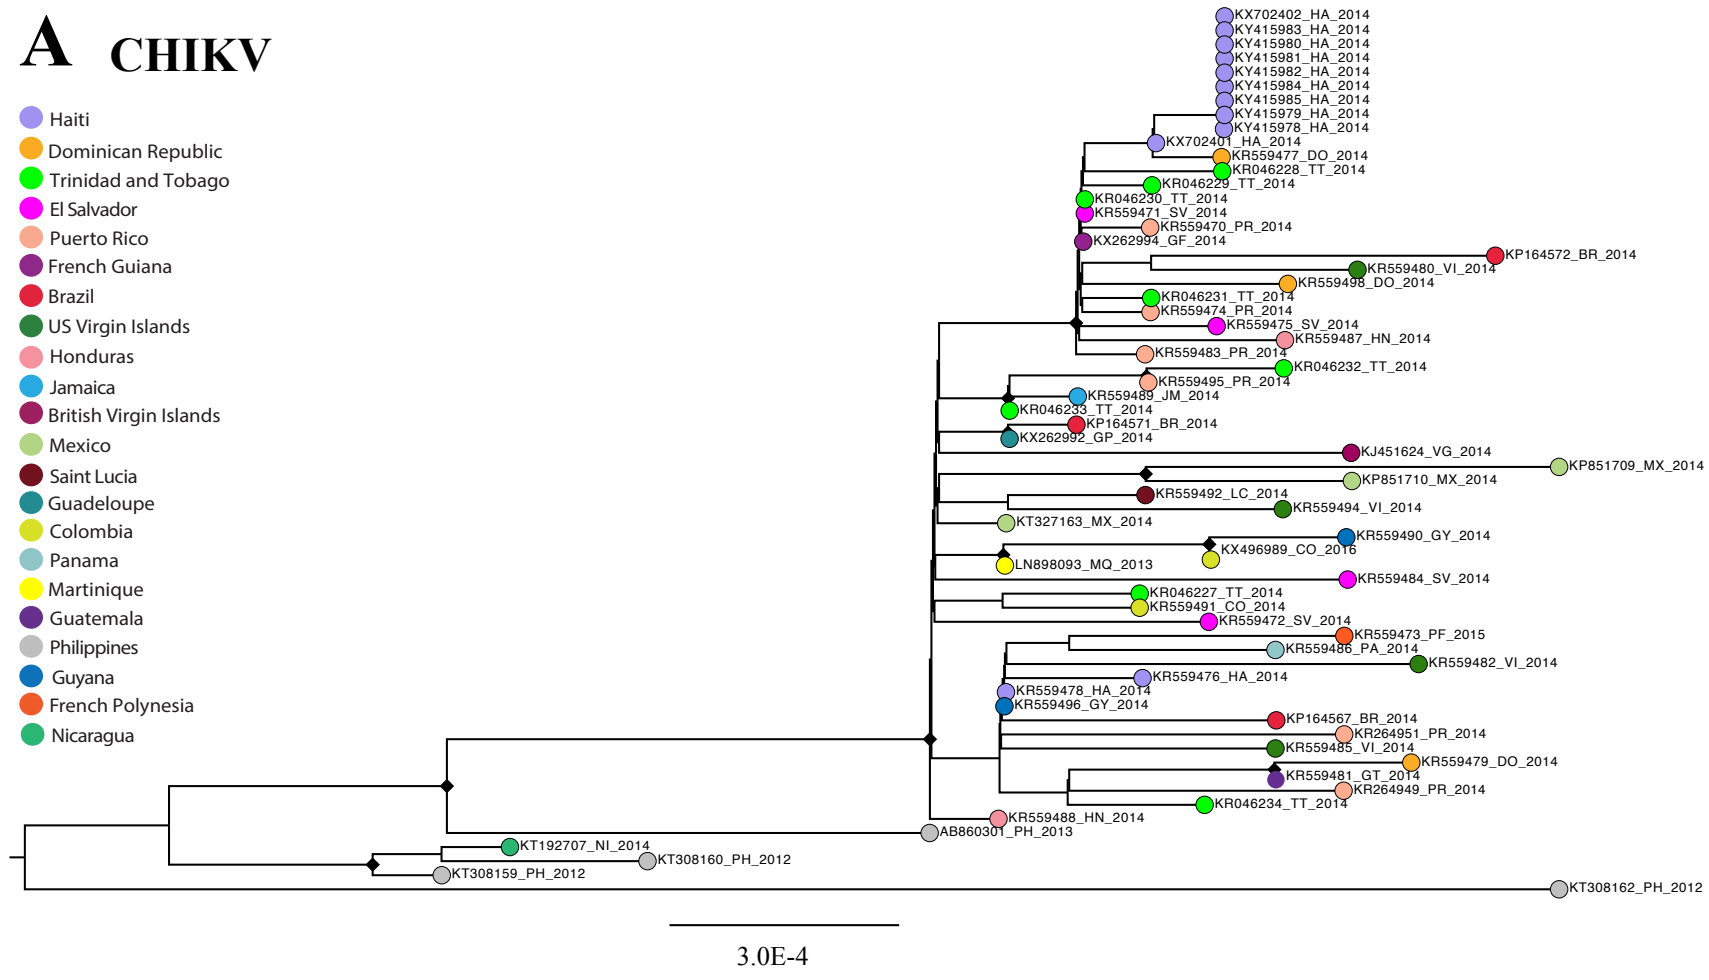

# B ZIKV

- USA, Florida
- Dominican Republic
- Haiti
- Guadeloupe
- Ecuador
- Brazil
- Venezuela
- Colombia
- Panama
- Mexico
- Martinique
- Peru
- Honduras
- Guatemala
- Puerto Rico
- French Guiana
- Suriname
- French Polynesia

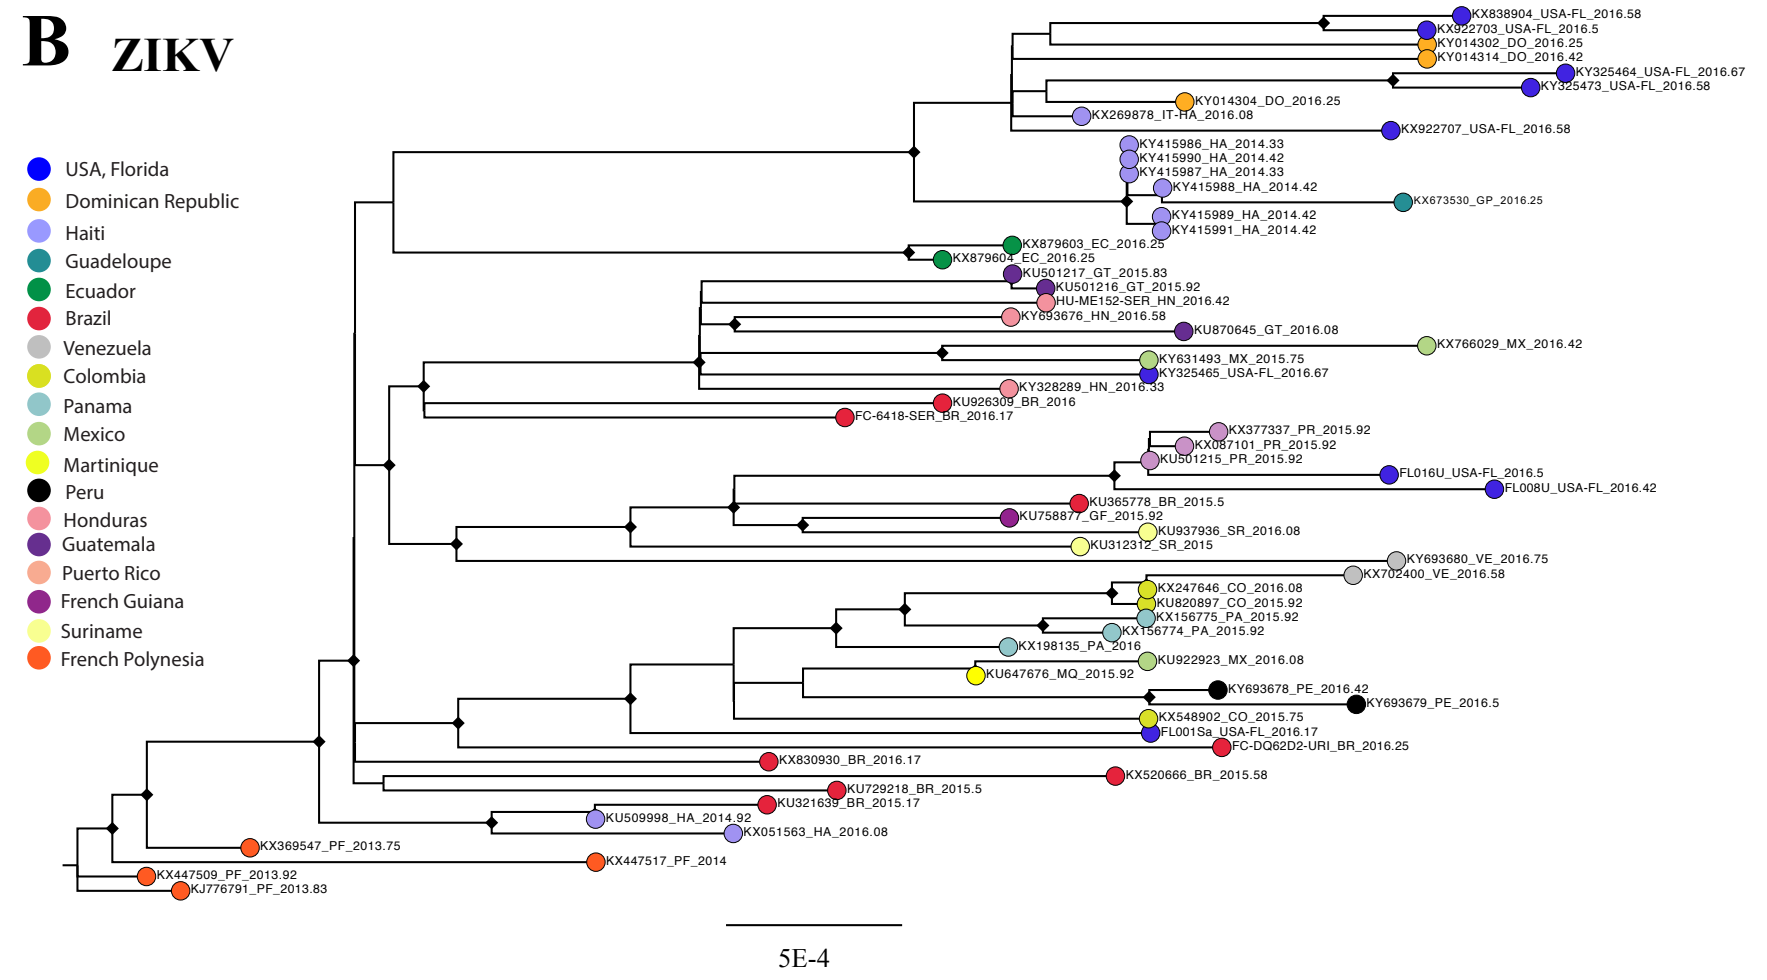

# C DENV-2

- USA, Florida
- Dominican Republic
- Haiti
- Guadeloupe
- French Guiana
- Brazil
- Martinique
- Peru
- Saint Kitts and Nevis
- Puerto Rico
- Jamaica
- Virgin Islands
- Suriname

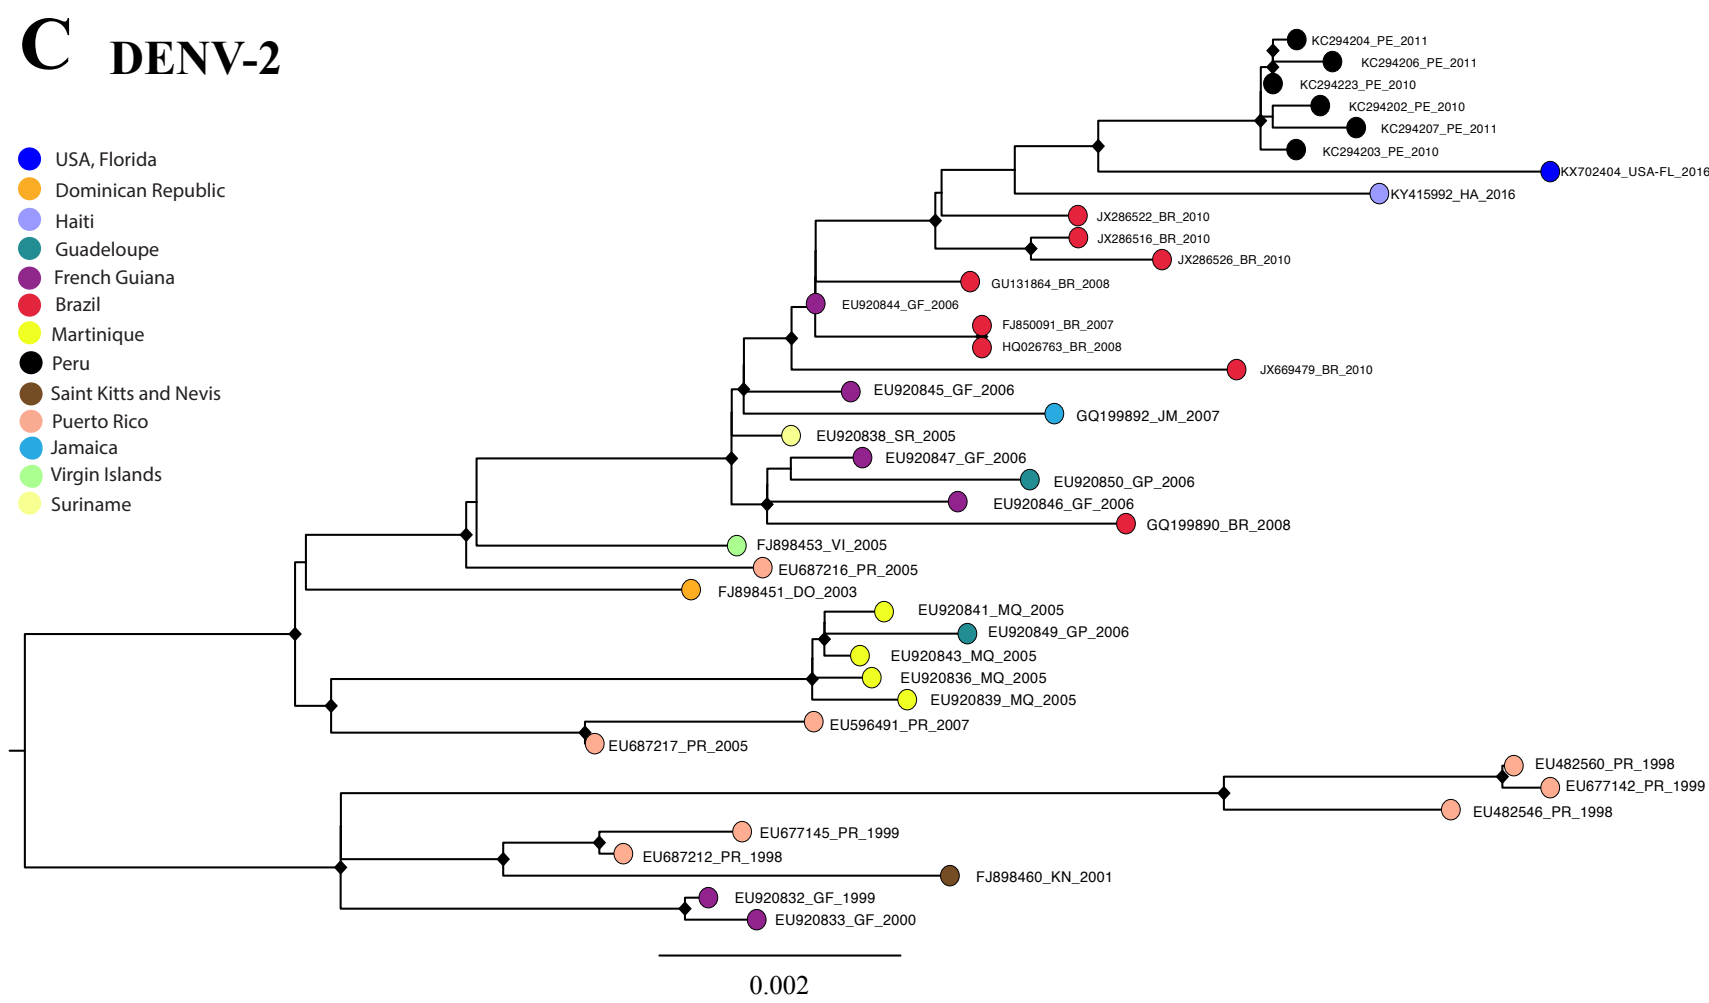

# D MAYV

- Haiti
- Brazil
- Venezuela
- Peru
- Trinidad and Tobago
- French Guiana
- Bolivia

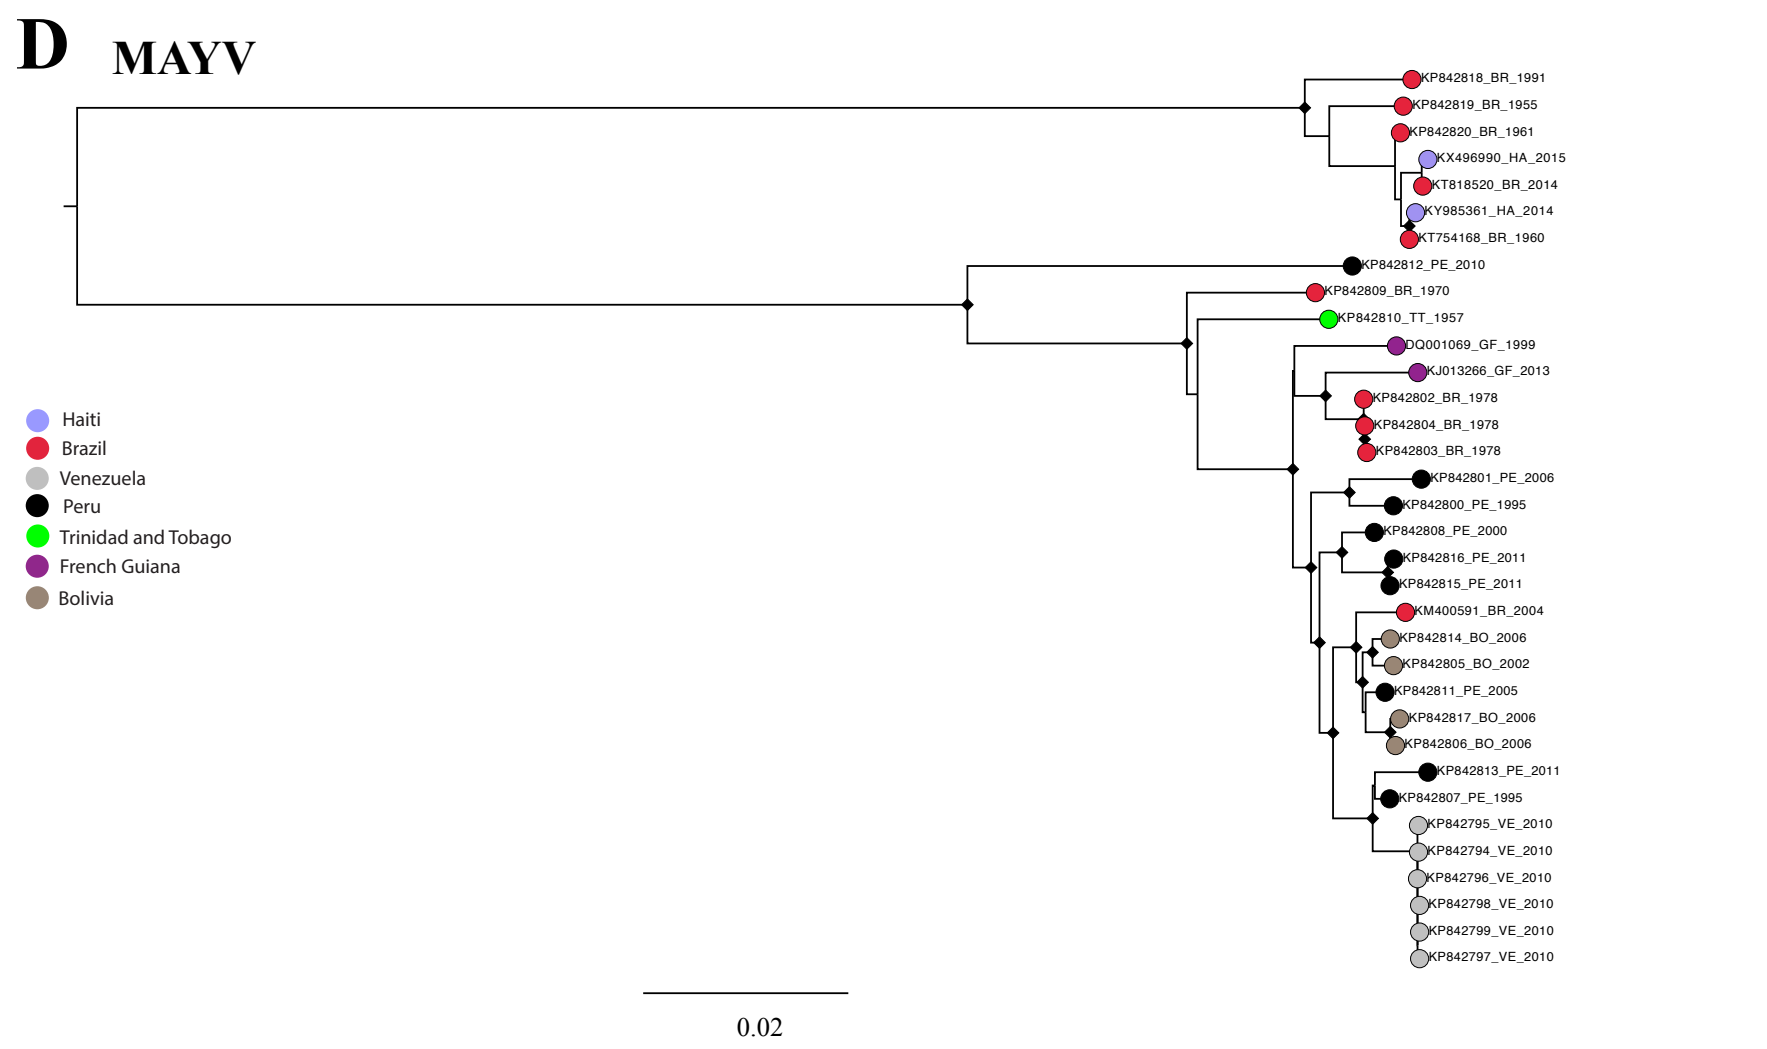

Supplement: pntd.0006505.s003.pdf [file pntd.0006505.s003.pdf]
