# Supplementary material for: Detection and phylogenetic characterization of arbovirus dual-infections among persons during a chikungunya fever outbreak, Haiti 2014
Source: PubMed Central journal article supplement (PMC5997359; doi:10.1371/journal.pntd.0006505), 2018-05-31
Supplement: pntd.0006505.s004.pdf [file pntd.0006505.s004.pdf]

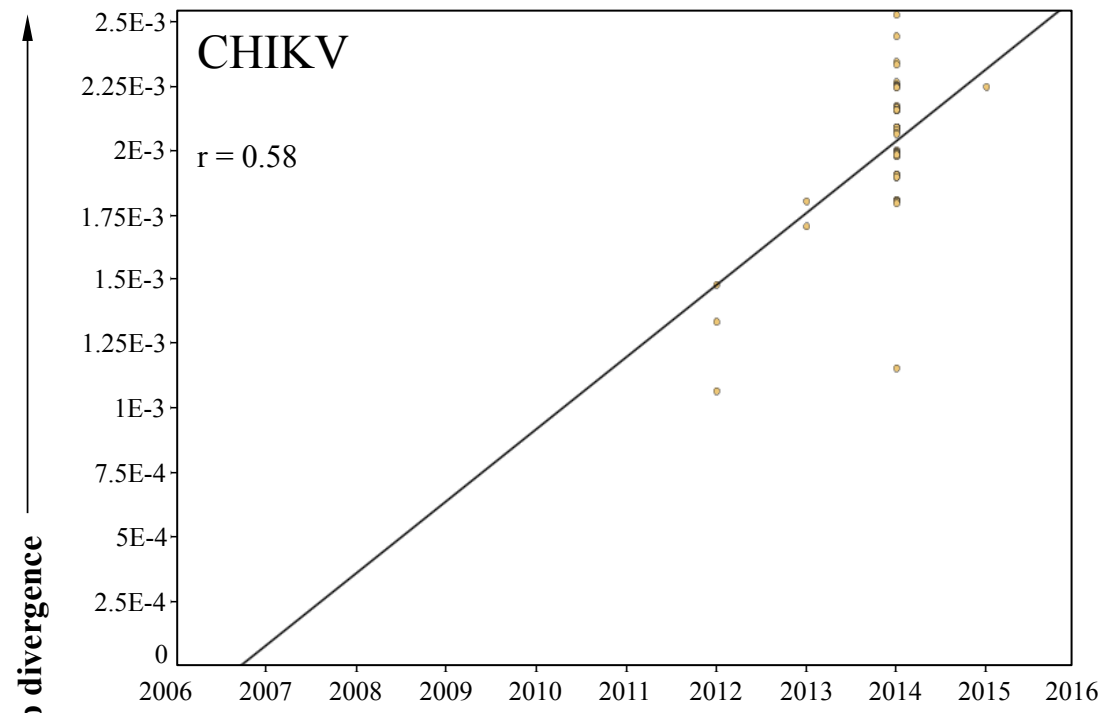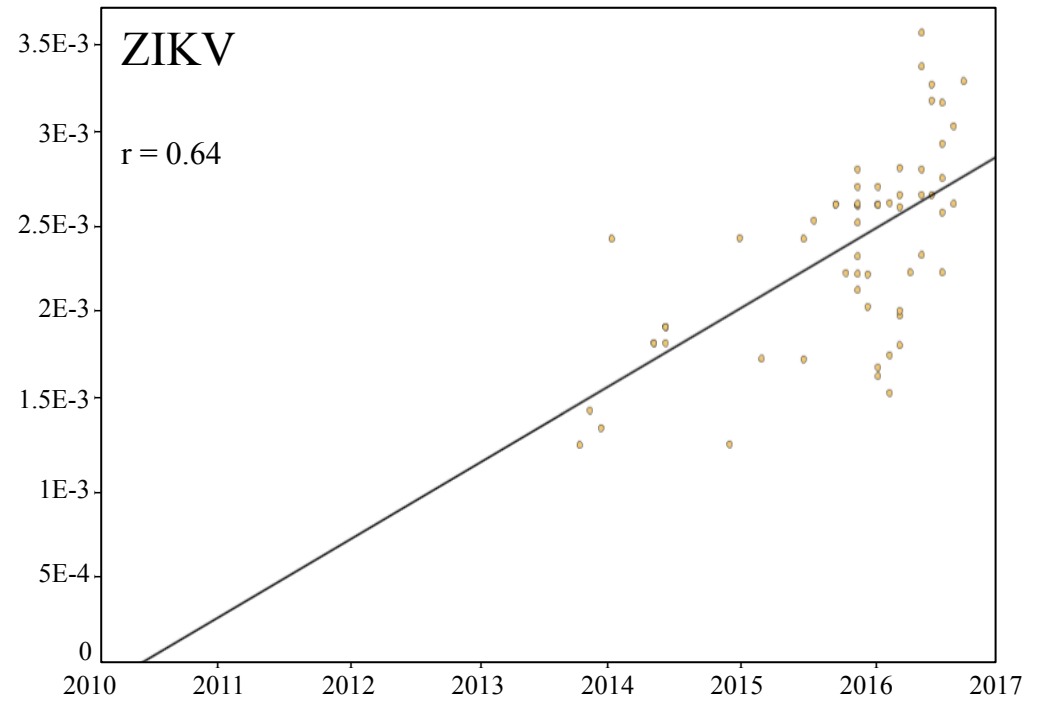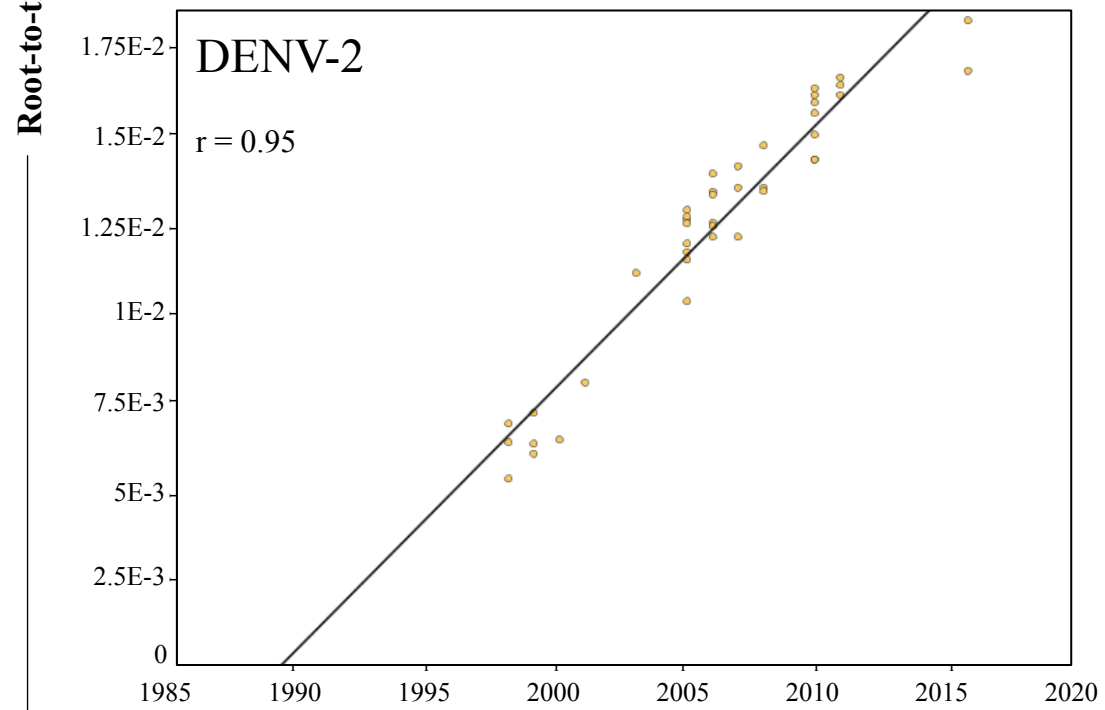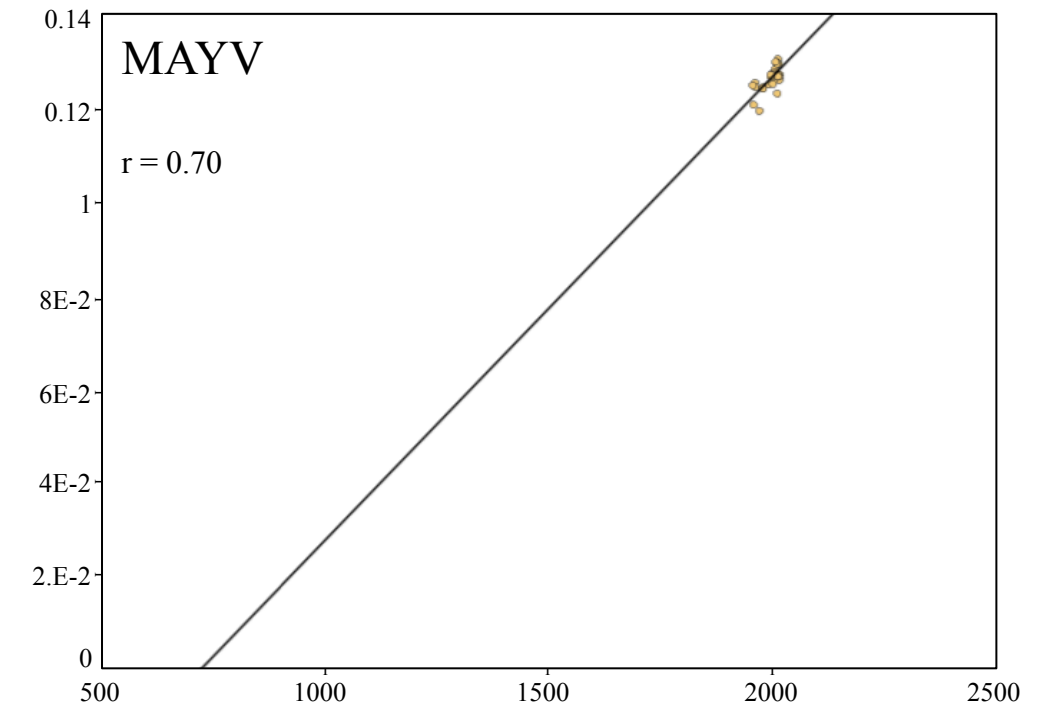

Root-to-tip divergence

Time
